# Supplementary material
Source: publisher figshare collection journal article supplement (https://future-science-group.figshare.com/ndownloader/files/32882372)
Supplement: Supplementary file 1 [file 32882372]

**SUPPLEMENTARY INFORMATION FILE**

**Nanocrystalline chloroxine possesses broad-spectrum antimicrobial activities and excellent skin tolerability in mice**

Jiří Trousil1, †, *, Jana Matějková2, 3, †, You-Shan Dai4, Tomáš Urbánek1, Miroslav Šlouf1, Miša Škorič5, Tomáš Nejedlý1, Martin Hrubý1, Jia-You Fang4

1 Institute of Macromolecular Chemistry, Czech Academy of Sciences, Heyrovského nám. 2, 162 00 Prague 6, Czechia

2 Department of Medical Microbiology, Second Faculty of Medicine, Charles University and Motol University Hospital, V Úvalu 84, 150 06 Prague 5, Czechia

3 Military Health Institute, Military Medical Agency, Tychonova 1, 160 00 Prague 6, Czechia

4 Pharmaceutics Laboratory, Graduate Institute of Natural Products, Chang Gung University, Taoyuan 333, Taiwan

5 Department of Pathological Morphology and Parasitology, Faculty of Veterinary Medicine, University of Veterinary Sciences Brno, Palackého tř. 1946/1, 612 42 Brno, Czechia

† These authors contributed equally to this work.

* Corresponding author. E-mail address: trousil@imc.cas.cz, jiri.trousil@centrum.cz


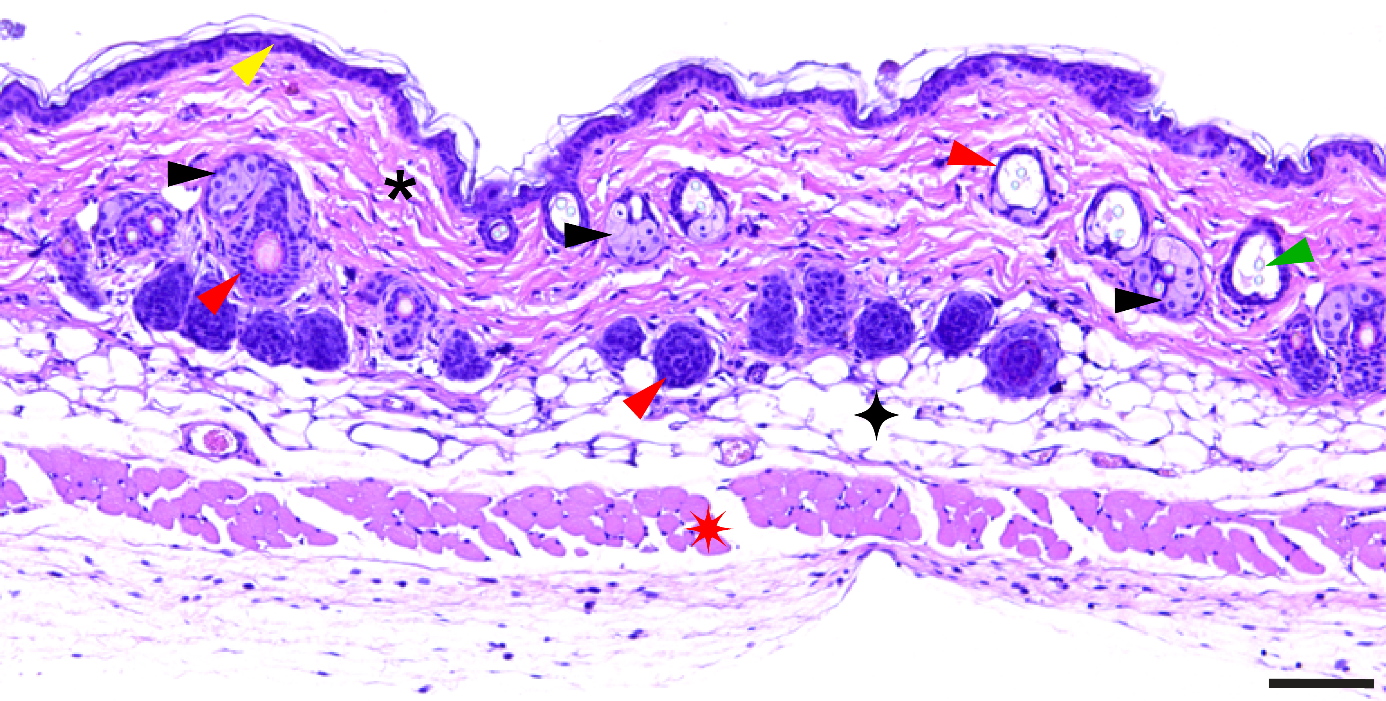
 **Figure S1** Representative H&E-stained section of mouse skin and a description of the morphological structures. A Brij 700-treated mouse skin (sham control) section is shown. Yellow arrowhead – normal epidermis with superficial keratinization; black arrowheads – normal sebaceous glands; green arrowhead – hairs on a transversal section inside a hair follicle; black asterisk – normal dermis formed by fibrous collagenous tissue; red arrowhead – normal hair follicles and the wall of a hair follicle on a transversal section; black four-pointed star – normal subcutaneous adipose and loose connective tissue; red eight-pointed star – muscular layer with underlying loose connective tissue. Scale bar: 100 µm.
